# Supplementary material
Source: publisher site journal article supplement (https://www.dovepress.com/article/566747)
Supplement: Supplementary file 1 [file 566747%20Revised%20supplementary%20materials.docx]

# Supplemental Materials

## Patient/Caregiver Discussion Guide

***Moderator Note:*** *Please introduce yourself and confirm that the respondent(s) has time to speak for ~60 mins. Then outline the following:*

This discussion is focused on understanding the patient and caregiver experience with Amyotrophic Lateral Sclerosis (ALS). Given your experience as a patient with ALS [or caregiver of a patient with ALS], we are interested in your perspective on what patients with ALS experience and what their challenges are.

The discussion will last about ~60 minutes. Before we start the discussion, I would also like to reiterate that:

- This project is sponsored by Regeneron Pharmaceuticals, Inc. (Regeneron)
- Your responses will be used by us and Regeneron to inform the ALS program strategy
- We will audio record our conversation for note-taking purposes. Is that okay with you? **[Moderator to start recording]**
- During the course of this interview, please advise me if you prefer not to answer any of the questions I ask; you also have the right to withdraw from this session at any time

The goals for today’s discussion are to learn about the experience of people with ALS or the caregivers of people with ALS, including initial presentation, testing, diagnosis, disease progression, palliative care, end-of-life care and any associated challenges or emotions*. [For SOD-1 patients]* Another goal is to learn about SOD-1 specific considerations and genetic testing.

***[Questions in grey text are lower priority]***

1. Background (1 min)
2. To start, could you please tell me a little about yourself and your background?
   - 1. **PROBE:** family, age, living situation, job, etc.
3. ***[If applicable]*** Can you tell me a little bit about your relationship to the person that you care for?
   - 1. **PROBE:** parent, guardian, close family member, friend, etc.
4. **Initial Presentation**

**[MODERATOR SCRIPT]** I would like to understand the different steps you/the person you care for has gone through with their ALS. Let’s start with the first showing of symptoms and the initial doctor’s visit.

1. Can you please describe the initial symptoms that you noticed?
   1. When did you start to think that something was wrong?
   2. What were you most concerned about when you/the person you care for started displaying symptoms?
      1. How severe were their symptoms?
      2. How did these symptoms impact your daily life and activities?
   3. How long did it take from initial symptoms to when you/the person you care for saw their first Health Care Provider?
      1. Which type of Health Care Provider (HCP) did you initially see?
         1. **PROBE:** Different types of Health Care Provider, such as:
            1. Primary Care Physician or General Practitioner
            2. Neurologist or other specialist
2. What resources, if any, did you use when researching the initial symptoms you/the person you care for experienced before going to the initial Health Care Provider visit?
   - 1. **PROBE**: websites, journals, social media platforms
     2. **PROBE**: which specific websites were most helpful?
3. What were the biggest challenges that you/the person you care for had when symptoms first emerged?
   - 1. **PROBE:** lack of information and resources online, lack of disease awareness
4. At symptom presentations, how did you feel emotionally?

PROBE: fear, confusion, anxiety

1. Why did you initially see a Health Care Provider? Was there a specific symptom or concern that prompted the doctor visit?
   1. Did this medical professional immediately suspect a neuromuscular disorder? Why or why not?
2. How long did it take for you to get an appointment with the first physician you visited?
3. To the best of your recollection, what tests did the doctor conduct at the initial visit to evaluate you/the person you care for?
4. Which lab tests were done in the initial evaluation?
   - 1. **PROBE**: Different types of tests, such as:
        1. Physical exam
        2. Blood or urine collection
        3. Different types of imaging to look at the muscles
        4. Muscular testing, by physically manipulating the muscles to test their response
        5. Neurological testing or Electromyograph (EMG) to test how the nerves and muscles work
5. What, if any, resources or information did you receive from the Health Care Provider following the initial evaluation?
6. **PROBE:** connections to Patient Advocacy Groups, referrals to other doctors, other online resources
7. **[IF YES to PAG]** Which Patient Advocacy Organizations (PAG) did you connect with? How helpful were they?
8. What information did the Health Care Provider communicate to you after the initial evaluation?
9. **ALS Testing**

**[MODERATOR SCRIPT]** I now want to focus on the testing and diagnostic process.

1. To the best of your recollection, what kind of tests were completed during your ALS assessment ? Did these confirm an ALS diagnosis?
   - 1. **PROBE**: Different types of tests, such as:
        1. Blood or urine collection
        2. Different types of imaging to look at the muscles
        3. Muscular testing, by physically manipulating the muscles to test their response
        4. Neurological testing or Electromyograph (EMG) to test how the nerves and muscles work
2. Was it recommended that you/the person you care for undergo genetic testing?
   1. **[IF YES]** What Health Care Provider recommended genetic testing
3. What was the rationale, if any?
4. Did you/the person you care for undergo genetic testing?
   1. **[IF YES]** What impacted your decision to undergo genetic testing?
      1. **PROBE:** family advocating for genetic testing
   2. **[IF YES]** Can you walk me through the pathway to genetic tests?
      1. **PROBE**: Where were the tests performed (Health Care Provider office, major medical center, neuromuscular center, hospital, genetic counsellor’s office)
      2. **PROBE:** Any issues to accessing genetic testing? How long did it take to access genetic testing?
5. **[IF SOD-1 PATIENT]** Can you describe your emotions and experience upon learning you/the person you care for had the SOD-1 gene?
6. Please describe the challenges that you for experienced during the testing process
   - 1. **PROBE:** financial, logistical, mental health and emotional
     2. **PROBE:** specific challenges faced and what was needed to resolve
     3. **PROBE:** access to health care provider and necessary testing
7. Did you/the person you care for see more than one type of Health Care Provider in the diagnostic process?
   1. If so, which types of Health Care Provider (s) did they see?
8. Throughout the testing process how did you feel emotionally and mentally?
9. **ALS Diagnosis**

**[MODERATOR SCRIPT]** Now I would like to learn more about your experience when the diagnosis was confirmed

1. How much time passed between noticing the first symptom and diagnosis?
   1. How much time passed between the initial physician visit and diagnosis?
2. Which type of Health Care Provider confirmed the ALS diagnosis?
   - 1. **PROBE:** Different types of doctors, such as:
        1. Primary Care Physician: A Health Care Provider who treats for routine and general health care needs
        2. General Neurologist: A Health Care Provider who is focuses on treating neurological or neuromuscular disorders
        3. Neuromuscular ALS Specialist: A Health Care Provider who is focuses on treating ALS
        4. Genetic Counsellor: A professional who works with the geneticist and A Health Care Provider to communicate diagnosis and discuss next steps
3. How did you feel when you/the person you care for received the diagnosis?
   - 1. **[IF SOD-1 PATIENT]:** How, if at all, did the hereditary component of the diagnosis impact you emotionally?
     2. **[IF SOD-1 PATIENT]** If at all how did SOD-1 diagnosis impact your family?
        1. **PROBE:** approach to sharing the diagnosis with family members
4. Please walk me through how the doctor described the diagnosis.
   1. How did your Health Care Provider respond to your thoughts and questions when communicating the diagnosis?
5. Did you/the person you care for receive any misdiagnoses?
   1. **[IF YES]** What was the person you care for misdiagnosed with? Why?
   2. How did the diagnosing Health Care Provider correct the misdiagnosis to arrive at the correct diagnosis?
   3. How long did it take to arrive to the correct diagnosis from the time of first symptom presentation?
      1. **PROBE:** total number of visits to arrive at correct diagnosis
6. What, if any, support and resources did you receive from the diagnosing Health Care Provider or care team at the time of diagnosis?
   - 1. **PROBE:** information on disease progression / diagnosis, treatment options, financial resources, emotional support, connection to PAGs
7. What, if any, resources did you use during and following the diagnosis?
   - 1. **PROBE:** PAGs, government services, physician / center-based services, websites, journals, social media
     2. **[IF YES to PAG]** Which Patient Advocacy Group(s) did you engage with? How helpful were they? How valuable were the resources they provided?
8. **Progression**

**[MODERATOR SCRIPT]** Now I would like for us to talk about the progression of ALS and symptoms you/the person you care for may experience

1. Which types of Health Care Providers do you or does the person you care for currently see for ALS treatment?
2. **PROBE:** Different types of Health Care Provider, such as:
3. Neurologist: A Health Care Provider who is focuses on neurological or neuromuscular disorders
4. Genetic Counselor: A professional who works with the geneticist and doctor to communicate diagnosis and discuss next steps
5. Cardiologist: A Health Care Provider who treats the heart and surrounding muscles
6. Pulmonologist: A Health Care Provider who treats the lungs and helps manage respiratory function
7. Gastroenterologist: A Health Care Provider that treats digestive health issues; may prescribe a G-tube
8. Physiotherapist: A Health Care Provider that helps the patient with movement and function
9. Speech/language therapist: A Health Care Provider that supports the patient’s verbal and language development
10. Psychiatric/psychologist: A mental health professional that supports the patient’s mental health and may prescribe medication
11. Respiratory Therapist: A Health Care Provider trained to help people with lung diseases or disorders
12. Nutritionist: an expert treating disease-related [malnutrition](https://en.wikipedia.org/wiki/Malnutrition) and in conducting [medical nutrition therapy](https://en.wikipedia.org/wiki/Medical_Nutrition_Therapy)
13. How has the types of health care providers changed as the disease progresses?
    1. How has the amount of heath care providers changed as the disease progresses?
14. Please describe the challenges if any, that you experienced as symptoms progressed
    1. If at all, how have the types of challenges changed as symptoms progress?
    2. **PROBE:** financial, logistical, and emotional burden
15. What, if any, support services or resources does you/the person you care for use?
    1. Has this changed as symptoms progress?
    2. What support services or resources would be helpful?
16. How, if at all, has your quality of life changed since diagnosis and throughout the progression of symptoms?
17. **[IF SOD-1 PATIENT]** How, if at all, did the SOD-1 diagnosis impact your symptoms, quality of life, and disease progression?
    1. How if at all, did the SOD-1 diagnosis impact your family or loved ones?
18. **[IF SOD-1 CAREGIVER]** How, if at all did the SOD-1 diagnosis, impact your experience?
    1. How, if at all was your ability to care for the person with ALS impacted because of SOD-1
    2. If any, what additional challenged did you encounter due to SOD-1?
    3. How, if at all, did SOD-1 impact your emotions throughout disease progression?
19. **Treatment and Management**

**[MODERATOR SCRIPT]** I would now like for us to discuss any treatment you/the person you care for has done and how that has changed throughout disease progression

1. Which treatment(s), if any, have the person you care for tried in the past? Why? What treatments are they currently on?
   1. **PROBE:** riluzole
   2. **PROBE:** edaravone
   3. PROBE:AMX0035
   4. **PROBE:** tofersen
   5. **PROBE:** clinical trial
   6. **PROBE:** other medications for symptom management
   7. **PROBE:** speech therapy
   8. **PROBE:** communication devices
   9. **PROBE:** respiratory or pulmonary support
   10. **PROBE:** dietician and nutritional support
2. How long were you/the person you care for on these treatment(s)?
   1. PROBE: why were treatments discontinued?
3. What were the outcomes you observed with these treatments?
   1. What were the benefits?
      1. **PROBE:** alleviation of symptoms, improved quality of life
   2. What did you not like about the treatments?
      1. **PROBE:** what would you change?
4. How accessible were the treatments?
   1. **PROBE** Did you have any issues accessing the treatment(s)?
   2. **[IF YES]** What were the barriers to access?
5. Which physician (specialty) leads the care team for you/the person you care for?
6. How frequently do you see the physician that leads your care?
7. Which other physicians are most involved currently in treating you/the person you care for?
   1. Has this changed over the course of disease progression?
8. Did you feel involved in the treatment decisions?
9. What, if any, resources did you use to find treatment options?
   1. **PROBE:** websites, journals, social media
   2. **PROBE:** influence of family members and loved ones
10. What, if any, support services do you use during treatment/the treatment of the person you care for?
    1. **PROBE:** PAGs, government services, physician / center-based services
11. Please describe the challenges that you might experience during treatment.
    1. **PROBE:** financial, logistical
    2. **PROBE:** mental, health emotional burden
12. Do you/the person you care for have experience with digital biomarker devices?
    1. **[IF YES]** Do you/the person you care for use them as part of management and treatment or during a clinical trial?
       1. **[IF YES]** Please describe your experience
13. **[IF SOD-1 PATIENT]** How, if at all, did the SOD-1 diagnosis impact your experience with treatment and management?
14. **Clinical Trials/Drug Development**
15. Did the Health Care Provider discuss the possibility of enrolling in a clinical trial? If so, how?
16. **[IF CLINICAL TRIAL MENTIONED]** Which clinical trial(s) has you/the person you care for participated in?
    1. How did you learn about the clinical trial initially?
       1. [PROBE]: Did you do any research?
       2. PROBE: PAG or other patients
    2. How did you and/or the person you care for make the decision to participate?
       1. [PROBE]: Influence of family and loved ones
    3. How involved was the care team leader in evaluating potential clinical trials?
    4. How did you and/or the person you care for navigate which trial to participate in?
    5. In what ways, if any, did you feel involved in the decision to enroll in a clinical trial?
    6. What were the most rewarding aspects of Clinical Trial participation
    7. What were some of the barriers or challenges during Clinical Trial Participation (site visit schedule, type/route of sample collection, administration of investigational drug, declining health)
    8. Have you had experience undergoing lumbar puncture (spinal tap) and/or intrathecal administration of drug
17. **[IF NO CLINICAL TRIAL EXPERIENCE]** Did/would you ever consider clinical trials?
    1. Would you have considered clinical trials that were recommended to you by your Health Care Provider? Why or why not?
    2. What reservations did/would you have about clinical trials?
    3. What resources would be helpful in considering a clinical trial opportunity?
18. What is your knowledge of the Drug Development process?
    1. [PROBE]: Do you know the phases of clinical development and the objective of each
    2. [PROBE]: Have you contributed to any drug development programs? If so, how?
       1. What was your experience?
       2. How was your feedback received?
       3. Did you see the results or any impact of your feedback?
19. **Challenges/Successes**
20. What, if any, were some ‘successes’ or positive aspects you / the person you care for, have in your journey? Where did things go well?
    - 1. PROBE: diagnose
      2. PROBE: resources
      3. PROBE: mental health
      4. PROBE: treatment options
      5. PROBE: access to clinical trials
21. What, if any, were the biggest challenges you / the person you care for, experience in your journey?
    - 1. PROBE: diagnose
      2. PROBE: awareness and resources
      3. PROBE: mental health
      4. PROBE: treatment options
      5. PROBE: access to clinical trials
22. **Summary and Close**
23. Do you have any final thoughts around anything we have discussed?

**[MODERATOR TO THANK PARTICIPANT AND CLOSE]**

Supplemental Table S1 Full List of Global Resources Used to Define the ALS Patient Journey

| Title/Link | Source | Type of Content | Perspective (Clinical, PLwALS, Caregiver, Advocacy) | Diagnosis | Stage of the Journey This Informs and How | Region |
| --- | --- | --- | --- | --- | --- | --- |
| [The evolving role of medical affairs in Asia−Pacific: Three imperatives for pharmakos](https://www.mckinsey.com/industries/life-sciences/our-insights/the-evolving-role-of-medical-affairs-in-asia-pacific-three-imperatives-for-pharmacos" \l "/) | McKinsey | Industry publication: PMR readout (n=12 pharma medical affairs respondents) | Clinical |  | **Diagnosis; progression and treatment; end-of-life care**: Region‑specific commentary on cultural impacts on clinical practice | APAC |
| [As Asia-Pacific ages, a caregiver crisis looms](https://www.bcg.com/publications/2023/caregiver-crisis-in-asia-pacific-countries) | Boston Consulting Group | Industry publication: PMR readout/white paper (n=9,000; across Australia, China, India, Japan, Indonesia, and Singapore) | Caregiver |  | **Progression and treatment**: Region‑specific working caregiver perspectives and challenges | APAC |
| [Partnering with patient organizations to address the unmet needs of patient communities in the Asia Pacific region and beyond](https://www.iapo.org.uk/sites/default/files/files/The%20Asia%20Pacific%20Patient%20Innovation%20Summit%20Whitepaper.pdf) | Asia Pacific Patient Innovation Summit | White paper | Advocacy |  | **Progression and treatment; end-of-life-care**: Region‑specific commentary on the role for pharma to optimize partnerships with local patient organizations | APAC |
| [Integrating patient engagement into healthcare/access to medicines in the Asia-Pacific region](https://www.duke-nus.edu.sg/docs/librariesprovider5/default-document-library/core--fastercures-inaugural-roundtable-on-patient-engagement_final-report.pdf?sfvrsn=97cfb76c_0) | Milken Institute/Duke NUS Medical School | White paper | Advocacy |  | **Progression and treatment; end-of-life-care:** Region‑specific commentary on the role for pharma to optimize patient engagement strategy | APAC |
| [The courageous Dr Ian Davis: finding an MND cure](https://www.youtube.com/watch?v=zWw5SL-_1qk) | 60 Minutes Australia | Video | PLwALS |  | **Diagnosis; progression and treatment:** Emotional impact (PLwALS and caregiver) of early diagnosis; impact on family planning | APAC (Australia) |
| [Interview with Masatane Muto, founder of WITH ALS](https://www.youtube.com/watch?v=2kLCuB8qSQA) | Japan Times | Video | PLwALS |  | **Diagnosis; progression and treatment:** Emotional impact of early diagnosis; PLwALS narrative of symptoms and disease progression | APAC (Japan) |
| [[Amazon Story] Hajime Takano, living with ALS; charting a new path with AI technology](https://www.youtube.com/watch?v=yA4xg98F1rk) | Amazon Japan | Video | PLwALS |  | **Diagnosis; progression and treatment**: Emotional impact of diagnosis; insights into daily routine; interdisciplinary care | APAC (Japan) |
| [Race against time for terrible 'family curse' of motor neuron disease](https://www.youtube.com/watch?v=y7GAoCsAUkA) | 60 Minutes Australia | Video | PLwALS, caregivers | Familial (*SOD1*) | **Testing; diagnosis; progression and treatment**: emotional impact of diagnosis, varying attitudes within a family on the role of genetic testing, impact on family planning, use of clinical trials as treatment modality | APAC (Australia) |
| [New Zealand best practice recommendations for the care of the people with motor neurone disease](https://mnd.org.nz/wp-content/uploads/2022/11/NZ-Best-Practice-Recommendations-For-The-Care-Of-People-With-MND-issue-1-November-2022-FINAL.pdf) | Neurological Association of New Zealand | Clinical guidelines | Clinical |  | **Testing; diagnosis; progression and treatment**: Country-specific clinical guidelines for ALS/MND patient care | APAC (New Zealand) |
| [Current status of the diagnosis and management of amyotrophic lateral sclerosis in Korea: A multi-center cross-sectional study](https://thejcn.com/DOIx.php?id=10.3988/jcn.2012.8.4.293) | Korean Neurological Association | Clinical guidelines | Clinical |  | **Testing; diagnosis; progression and treatment**: Country-specific clinical guidelines for ALS/MND patient care | APAC (Korea) |
| [Amyotrophic lateral sclerosis treatment guidelines 2013](https://www.neurology-jp.org/guidelinem/als2013_index.html) | Japanese Society of Neurology | Clinical guidelines | Clinical |  | **Testing; diagnosis; progression and treatment**: Country-specific clinical guidelines for ALS/MND patient care | APAC (Japan) |
| [Multidisciplinary management of motor neurone disease](https://www1.racgp.org.au/getattachment/90b69101-be7c-4341-a752-5f9185a9859f/Multidisciplinary-management-of-motor-neurone-dise.aspx) | Royal Australian College of General Practitioners | Clinical guidelines | Clinical |  | **Testing; diagnosis; progression and treatment**: Country-specific clinical guidelines for ALS/MND patient care | APAC (Australia) |
| [Motor neurone disease: Assessment and management (NICE guideline NG42)](https://www.nice.org.uk/guidance/ng42) | The National Institute for Health and Care Excellence | Clinical guidelines | Clinical |  | **Testing; diagnosis; progression and treatment**: Country-specific clinical guidelines for ALS/MND patient care | Global (UK) |
| [EFNS guidelines on the clinical management of amyotrophic lateral sclerosis (MALS) – revised report of an EFNS Task Force](https://onlinelibrary.wiley.com/doi/10.1111/j.1468-1331.2011.03501.x) | The EFNS Task Force on Diagnosis and Management of Amyotrophic Lateral Sclerosis (European Academy of Neurology) | Clinical guidelines | Clinical |  | **Testing; diagnosis; progression and treatment**: Region‑specific clinical guidelines for ALS/MND patient care | Global (EMEA) |
| [Global, regional, and national burden of motor neuron diseases 1990–2016: A systematic analysis for the Global Burden of Disease Study 201](https://www.thelancet.com/journals/laneur/article/PIIS1474-4422(18)30404-6/fulltext)6 | Global Burden of Disease 2016 Motor Neuron Disease Collaborators (funded by the Bill and Melinda Gates Foundation) | Journal article | Clinical |  | **Initial presentation; testing**: Country‑specific diagnosed prevalence estimates | Global (APAC, NORAM) |
| [Trends in the diagnostic delay and pathway for amyotrophic lateral sclerosis patients across different countries](https://www.frontiersin.org/articles/10.3389/fneur.2022.1064619/full) | Frontiers in Neurology | Journal article | Clinical |  | **Testing; diagnosis**: Multinational cohort from 5 centers; reported delay from symptoms to diagnosis of 11 months as well as contributing social, economic, and clinical factors influencing the delay | Global (Poland) |
| [Preferences on the timing of initiating advance care planning and withdrawing life-sustaining treatment between terminally-ill cancer patients and their main family caregivers: A prospective study](https://www.ncbi.nlm.nih.gov/pmc/articles/PMC7662916/pdf/ijerph-17-07954.pdf) | International Journal of Environmental Research and Public Health | Journal article | Clinical |  | **End-of-life care and bereavement**: Cultural influences on end-of-life clinical care (differences between Asia and the West) | APAC (Taiwan) |
| [Genetic epidemiology of amyotrophic lateral sclerosis: A systematic review and meta-analysis](https://jnnp.bmj.com/content/88/7/540) | Journal of Neurology and Neurosurgery, and Psychiatry | Journal article | Clinical |  | **Initial presentation; testing:** Reported differences in *SOD1* prevalences in APAC | APAC (Japan, Korea, Taiwan, China) |
| [Genetic counselling in ALS: Facts, uncertainties and clinical suggestions](https://jnnp.bmj.com/content/85/5/478) | Journal of Neurology and Neurosurgery, and Psychiatry | Journal article | Clinical |  | **Testing**: Guidelines on genetic testing for familial ALS | Global |
| [Genetic testing in ALS: A survey of current practices](https://www.ncbi.nlm.nih.gov/pmc/articles/PMC5333513/pdf/NEUROLOGY2016758219.pdf) | Neurology (American Academy of Neurology) | Journal article | Clinical |  | **Testing; diagnosis:** Clinician attitudes about the use of genetic testing in ALS | Global (NORAM, APAC, EMEA) |
| [Differences in attitudes toward genetic testing among the public, patients, and health-care professionals in Korea](https://www.ncbi.nlm.nih.gov/pmc/articles/PMC6138694/pdf/41431_2018_Article_191.pdf) | European Journal of Human Genetics | Journal article | Clinical |  | **Testing**: Country‑specific PLwALS and clinician attitudes around genetic testing; how frequently *SOD1* is tested; whether pre-symptomatic testing is offered to family members of PLwALS | APAC (Korea) |
| [Burden of common neurologic diseases in Asian countries, 1990–2019: An analysis for the Global Burden of Disease Study 2019](https://www.ncbi.nlm.nih.gov/pmc/articles/PMC10238164/pdf/WNL-2023-000109.pdf) | Neurology (American Academy of Neurology) | Journal article | Clinical |  | **Progression and treatment:** Country-specific assessment of burden of disease. Disability-adjusted life years rankings typically lower than other neurological conditions like stroke, migraine, and dementia | APAC |
| [A long overdue recognition: Domestic workers as caregivers for older people in Asia](https://www.thelancet.com/pdfs/journals/lanhl/PIIS2666-7568(23)00033-8.pdf) | The Lancet | Journal article | Caregiver |  | **Progression and Treatment:** Commentary on caregiver dynamics (shift towards non‑family member, untrained, or migrant caregivers) | APAC (Malaysia) |
| [Societal narratives on caregivers in Asia](https://www.ncbi.nlm.nih.gov/pmc/articles/PMC8583461/pdf/ijerph-18-11241.pdf) | International Journal of Environmental Research and Public Health | Journal article | Caregiver |  | **Progression and treatment**: Online narratives about caregiving in APAC; country differences discussed | APAC (Singapore, Malaysia, India, Hong Kong) |
| [Long-term care system in Japan](https://www.ncbi.nlm.nih.gov/pmc/articles/PMC7533196/pdf/agmr-20-0037.pdf) | Annals of Geriatric Medicine and Research | Journal article | Clinical |  | **Progression and treatment:** Information about Japanese welfare services (tiered by level of need) | APAC (Japan) |
| [Burden of caregivers of the elderly with chronic illnesses and their associated factors in an urban setting in Malaysia](https://www.iqvia.com/library/articles/understanding-the-opportunities-and-challenges-in-latin-americas-pharmaceutical-markets?enrichId=rgreq-b29a1f7693da26e42d46f10d7abb540e-XXX&enrichSource=Y292ZXJQYWdlOzI3NTMyOTAxNjtBUzoyMjExODI0MTE0NDgzMjBAMTQyOTc0NTQwNDkxMw%3D%3D&el=1_x_3&_esc=publicationCoverPdf) | Malaysian Journal of Public Health Medicine | Journal article | Caregiver |  | **Progression and treatment: C**ountry specific insights on caregiver perspective (Malaysian caregivers are primarily the daughters of PLwALS, citing time needed for caregiving activities as their highest burden; emotional burden was ranked as "low" and caregiving did not affect the caregiver's psychological well‑being) | APAC (Malaysia) |
| [The demography of multigenerational caregiving: A critical aspect of the gendered life course](https://journals.sagepub.com/doi/full/10.1177/2378023119862737) | Socius: Sociological Research for a Dynamic World | Journal article | Caregiver |  | **Progression and treatment:** Caregiver demographics | Global (EMEA) |
| [Amyotrophic lateral sclerosis and motor neuron syndromes in Asia](https://jnnp.bmj.com/content/jnnp/87/8/821.full.pdf) | Journal of Neurology and Neurosurgery, and Psychiatry | Journal article | Clinical |  | **Initial presentation**: Country-specific reported values of ALS prevalence (per 100,000), estimated patient counts, and *SOD1* frequencies | APAC (China, India, Japan, South Korea, Taiwan, Australia, New Zealand, Malaysia) |
| [A survey on patients’ disease perception and the impact of the COVID-19 pandemic on persons living with amyotrophic lateral sclerosis in Malaysia](https://www.ncbi.nlm.nih.gov/pmc/articles/PMC8320654/pdf/nmt-2021-0004.pdf) | Neurogenerative Disease Management | Journal article | Clinical |  | **Progression and treatment:** APAC insights on improving care in the context of COVID-19, with a focus on opportunities in lower-to-middle income countries. Use of alternative medicine (financial implications) is discussed. Caregivers were primarily family members, living together. Riluzole use is discussed | APAC (Malaysia) |
| [Current status of the diagnosis and management of amyotrophic lateral sclerosis in Korea: A multi-center cross-sectional study](https://thejcn.com/DOIx.php?id=10.3988/jcn.2012.8.4.293) | Journal of Clinical Neurology | Journal article | Clinical |  | **Diagnosis; progression and treatment; end-of-life care and bereavement:** Cross-sectional and retrospective study across 35 medical centers. High usage of invasive tracheostomy reported | APAC (Korea) |
| [Initiation and withdrawal of invasive ventilation for patients with amyotrophic lateral sclerosis: A narrative literature review](https://www.mdpi.com/2571-8800/5/3/27) | J - Multidisciplinary Scientific Journal | Journal article | Clinical/advocacy |  | **End-of-life care and Bereavement:** Higher reported use of invasive tracheostomy compared to western medical centers. Cultural hypotheses postulated, influence of family and physician opinions on critical patient care decisions is discussed. Advocacy groups in Japan have advocated for use of invasive ventilation; Japanese physicians are reported to recommend invasive ventilation (despite not wanting it for themselves in a similar situation) and oppose a patient's right to discontinue invasive ventilation | APAC (Japan) |
| [Difference in the care of patients with amyotrophic lateral sclerosis with and without intervention from the palliative care team: Observations from a center in Japan](https://www.ncbi.nlm.nih.gov/pmc/articles/PMC8310746/pdf/pmr.2020.0084.pdf) | Palliative Medicine Reports | Journal article | Clinical |  | **End-of-life care and bereavement: C**ohort study of 60 Japanese PLwALS (followed until death) with and without intervention of palliative care. Higher rates of symptomatic pharmacologic management (opioid, anti‑anxiety, anti‑depressant use) were seen in the palliative care group | APAC (Japan) |
| [Time to diagnosis and factors affecting diagnostic delay in amyotrophic lateral sclerosis](https://www.sciencedirect.com/science/article/pii/S0022510X20303919) | Journal of Neurological Sciences | Journal article | Clinical |  | **Initial presentation; testing; diagnosis**: Factors contributing to delayed diagnosis explored (bulbar vs limb presentation, age, comorbidities) and future clinical/educational opportunities defined | Global (NORAM, Europe, Japan) |
| [Improving clinical trial outcomes in amyotrophic lateral sclerosis](https://www.nature.com/articles/s41582-020-00434-z) | Nature Reviews Neurology | Journal article | Clinical |  | **Progression and treatment:** Current ALS clinical trial challenges explored |  |
| [An assessment of treatment guidelines, clinical practices, demographics, and progression of disease among patients with amyotrophic lateral sclerosis in Japan, the United States, and Europe](https://www.tandfonline.com/doi/full/10.1080/21678421.2017.1361445) | Amyotrophic Lateral Sclerosis and Frontotemporal Degeneration | Journal article | Clinical |  | **Testing; diagnosis; progression and treatment**: The clinical practice/approach for identification, diagnosis, and management of ALS in Japan is consistent with the USA. Similar to other sources, clinical guidelines in Japan report less flexibility in withdrawing invasive ventilation. Edaravone usage in Japan is discussed | Global (APAC, NORAM, Europe) |
| [ALS is a multistep process in South Korean, Japanese, and Australian patients](https://www.neurology.org/doi/pdf/10.1212/WNL.0000000000009015) | Neurology (American Academy of Neurology) | Journal article | Clinical |  | **Initial presentation**: Country-specific disease pathogenesis pathways outlined based on mathematical modeling of epidemiology data (incidence, prevalence, mortality); Japanese and Australian patients are reported to develop ALS in 6 steps compared to South Koreans (5-step process) | APAC |
| [Graeme's MND story](https://www.youtube.com/watch?v=mAhoAfJParM) | MND New Zealand | Video | PLwALS |  | **Diagnosis; progression and treatment**: personal narrative about coping with the emotional impact of diagnosis, long-term implications for family | APAC (New Zealand) |
| [Neil Ladyman talks about living with MND](https://www.youtube.com/watch?v=nvhCZtuWTto) | MND New Zealand | Video | Patient |  | **Diagnosis; progression and treatment**: Personal narrative about shock of diagnosis/initial symptoms, interdisciplinary care, use of non‑invasive respiratory support, and family as emotional support | APAC (New Zealand) |
| [Kirsty's MND story](https://www.youtube.com/watch?v=PZiQ2P-XZw8) | MND New Zealand | Video | Patient |  | **Diagnosis; progression and treatment**: Personal narrative about emotional impact of diagnosis/ prognosis | APAC (New Zealand) |
| [Adapting to life with motor neurone disease (MND)](https://www.youtube.com/watch?v=Ij_xfvsMZSA) | Livewell Southwest | Video | Patient, caregiver, family |  | **Progression and treatment:** Narrative, discussion of voice/ communication aids | Global (UK) |
| [20210612 caring for ALS patients](https://www.youtube.com/watch?v=32UQe1q_iZY) | Taiwan Buddhist Tzu Chi Foundation | Video | PLwALS, advocacy |  | **Progression and treatment**: Interview with Tan Shua Hua, patient ambassador for MND Malaysia (symptom progression and impact of the COVID-19 pandemic); interview with MND Malaysia Vice Chair Liew Yaw Long (role of patient organization, establishment of multi-disciplinary care clinics that incorporate palliative care and 3 defined stages of ALS) | APAC (Malaysia) |
| [20160820 loving father suffers from ALS](https://www.youtube.com/watch?v=s3e3-5LNkMI) | Singapore Buddhist Tzu Chi Foundation | Video | Family, c-aregiver |  | **Progression and treatment:** Multidisciplinary care, ventilation, rehabilitation medicine, and preserving quality of life | APAC (Singapore) |
| [Living with MND](https://www.youtube.com/watch?v=_vLUY9TMeoc) | MND Australia | Video | PLwALS, caregiver, clinician, advocacy |  | **Initial presentation; diagnosis; progression and treatment:** Interview with PLwALS, caregiver/spouse and clinician advocates with MND Australia. Discussion of presenting and symptoms, coping with the emotional impact of diagnosis | APAC (Australia) |
| [Anna's motor neurone disease (MND) Story](https://www.youtube.com/watch?v=dWgrNzGBPEc) | Anna Penhall (produced by Exponline Official) | Video | Caregiver |  | **Initial presentation; diagnosis; progression and treatment; end-of-life care and bereavement:** Video interviews with family (husband/ caregiver and children) about disease progression, rapid loss of voice, ongoing daily medication routine, and entry into hospice care | APAC (Australia) |
| [Anna Penhall funeral](https://www.youtube.com/watch?v=afIKCCumfeE) | Anna Penhall | Video | Caregiver |  | **End-of-life care and bereavement:** Caregiver eulogy with reflection of end-of-life care (final 2 years of disease state) | APAC (Australia) |
| [Lara Huddleston story](https://www.youtube.com/watch?v=me9miU7S2sI) | FightMND (Australia) | Video | PLwALS, caregiver |  | **Diagnosis**: Video interview with PLwALS and husband; emotional impact; coming to terms with terminal diagnosis | APAC (Australia) |
| [Greg's story](https://www.youtube.com/watch?v=aevB9zOoekI) | FightMND (Australia) | Video | PLwALS, caregiver |  | **Initial presentation; diagnosis**: Video interview with PLwALS and husband; emotional impact; coming to terms with terminal diagnosis | APAC (Australia) |
| [Motor neurone disease sufferer calls for right to die with dignity](https://www.youtube.com/watch?v=UKxM2kzZSWo) | The Guardian | Video | PLwALS |  | **Diagnosis; end-of-life care and bereavement:** Video interview with PLwALS, coming to terms with terminal nature of diagnosis | Global (UK) |
| [Tony Judt on having motor neuron disease](https://www.youtube.com/watch?v=m-zuoFtQzfw) | The Guardian | Video | PLwALS |  | **Progression and treatment; end-of-life care and bereavement:** Interview about experience of progressing symptoms and terminal nature of diagnosis (personal and family perspectives) | Global (UK) |
| [Graham Johnson story](https://www.youtube.com/watch?v=OrfABflX4oA) | MND South Australia | Video | PLwALS |  | **Initial presentation; progression and treatment:** Interview about living with MND, needs of an APAC PAG role and needs. MND South Australia receives some federal funding but also partially relies on private charitable donations. Stated PAG objectives in the video are to get PLwALS access to services and technology to improve daily quality of life | APAC (Australia) |
| [Fight MND - Adena's story](https://www.youtube.com/watch?v=qD6eyn3NYI8) | Fight MND | Video | PLwALS |  | **Diagnosis; progression and treatment:** Interview about MND diagnosis; grief/impact of diagnosis | APAC (Australia) |
| [Fight MND - Dom's story. This is why we fight.](https://www.youtube.com/watch?v=fnCxNnAiS_A) | Fight MND | Video | PLwALS |  | **Progression and treatment:** Patient perspectives on clinical trial participation | APAC (Australia) |
| [Fight MND - Bron's story](https://www.youtube.com/watch?v=ErHUq3HzFE8) | Fight MND | Video | Family |  | **Diagnosis; end-of-life care and bereavement:** Video interview with sister of PLwALS (rapid progression) | APAC (Australia) |
| [Mauri mate – A Māori palliative care framework for hospices](https://teora.maori.nz/te-ora-in-partnership/mauri-mate-maori-palliative-care-framework/) | Totara Hospice/Mary Potter Hospice | Clinical guidelines | Clinician, caregiver |  | **End-of-life care and bereavement:** New Zealand best practices for traditional Māori medicine in the context of palliative care administration; emphasizes the importance of the whānau (caregiver) and the need to have culturally competent communication | APAC (New Zealand) |
| [Global, regional, and national burden of motor neuron diseases 1990–2016: A systematic analysis for the Global Burden of Disease Study 2016](https://www.thelancet.com/action/showPdf?pii=S1474-4422%2818%2930404-6) | The Lancet | Journal article | PLwALS |  | **Diagnosis:** Country-specific estimates of diagnosed ALS population | Global |
| [Lessons from Latin America: The early landscape of healthcare public-private partnerships](https://www.pwc.com/gx/en/industries/healthcare/publications/lessons-from-latin-america.html) | PricewaterhouseCoopers/University of California San Francisco Global Health Group | White paper | Clinical |  | **Initial presentation**: Provides overview of Colombian healthcare landscape, public vs private funding, available resources, and overview of recent public health legislature | LATAM |
| [From Mexico to Chile: Understanding the opportunities and challenges in Latin America’s pharmaceutical markets](https://www.researchgate.net/publication/275329016_Burden_of_caregivers_of_the_elderly_with_chronic_illnesses_and_their_associated_factors_in_an_urban_setting_in_Malaysia) | IQVIA Market Prognosis | White paper | Clinical |  | **Treatment: C**ommercial landscape assessment defining LATAM as one of the fastest-growing regions, with country-specific epidemiology and economic insights. Market growth will be driven by high-cost drugs for cancer and chronic/rare diseases. Colombian retail sales are expected to increase due to public health reforms (dissolution of private health insurance funds) increasing the number of uninsured PLwALS | LATAM |
| [The outlook for the Latin American pharmaceutical market](https://www.iqvia.com/library/publications/the-outlook-for-the-latin-american-pharmaceutical-market#:~:text=Studying%20the%20seven%20key%20LATAM,the%20second%20half%20of%202022.) | IQVIA Market Prognosis | White paper | Clinical |  | **Treatment: D**iscusses drivers and barriers of regional market growth; regulatory barriers to accessing innovative therapies | LATAM |
| [Funding environment for rare diseases in low and middle income countries](https://www.iqvia.com/locations/asia-pacific/library/white-papers/funding-environment-for-rare-diseases-in-lmics) | IQVIA | White paper | Clinical, advocacy |  | **Treatment: D**iscusses current landscape of healthcare expenditures (breakdown by payer type); growth in this market is currently driven by federal investments | LATAM |
| [Unlocking the economic potential of the health sector in Latin America](https://www.iqvia.com/insights/the-iqvia-institute/reports-and-publications/reports/unlocking-the-economic-potential-of-the-health-sector-in-latin-america) | IQVIA Institute for Human Data Science | White paper | Clinical |  | **Treatment:** Insights on regional healthcare pricing and sustainability challenges, as well as the role for pharma to help meet those challenges | LATAM |
| [Argentina: Public health budget and abortion access at risk after Milei elected president](https://www.bmj.com/content/383/bmj.p2771.full) | British Medical Journal | Journal article | Advocacy |  | **Treatment:** Article on recent election of Argentinian president, implications for future of public healthcare spending | LATAM (Argentina) |
| [Ethnic and demographic incidence of amyotrophic lateral sclerosis (ALS) in Brazil: A population based study](https://pubmed.ncbi.nlm.nih.gov/26850047/) | Amyotrophic Lateral Sclerosis and Frontotemporal Degeneration | Journal article | Clinical |  | **Initial presentation:** Ethnic/ demographic analysis of Brazilian ALS population; although incidence is similar to other countries, there is a reported lower age at death and predominance in the Caucasian population | LATAM (Brazil) |
| [From capital to countryside. Living with ALS in Brazil](https://www.philips-foundation.com/a-w/articles/living-with-als-in-brazil.html) | Phillips Foundation | Article (patient advocacy) | Advocacy |  | **Initial presentation**: Summary of philanthropic information campaigns to increase disease awareness and access | LATAM (Brazil) |

**Abbreviations:** AI, artificial intelligence; ALS, amyotrophic lateral sclerosis; APAC, Asia-Pacific; EFNS, European Federation of the Neurological Societies; EMEA, Europe/Middle East/Africa; LATAM, Latin America; MND, motor neuron disease; NICE, National Institute for Health and Care Excellence; NORAM, North America; PAG, patient advocacy group; PLwALS, person/people living with ALS; PMR, post-marketing requirement; *SOD1*, superoxide dismutase 1.

Supplemental Figure S1 Initial ALS patient journey map developed following a global audit and patient advocate interviews.


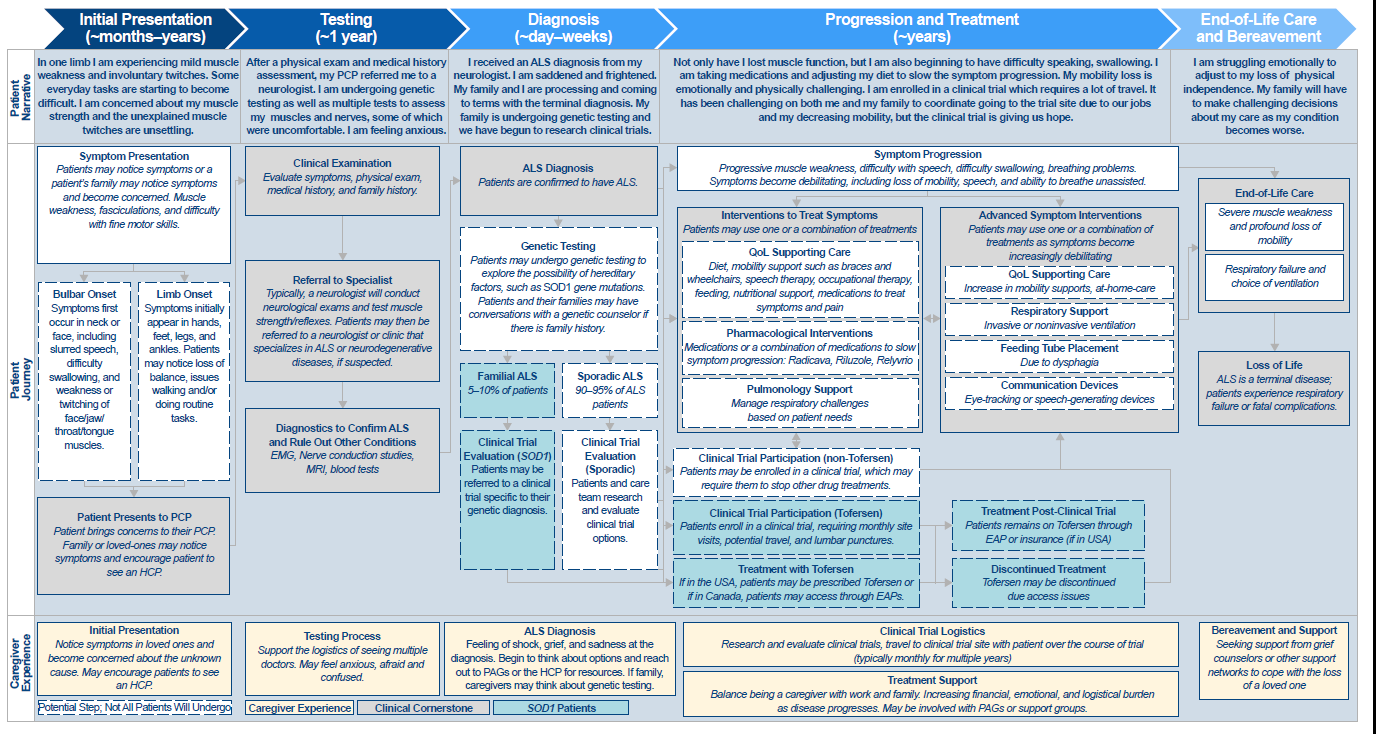


**Abbreviations:** ALS, amyotrophic lateral sclerosis; EAP, employee assistance program; EMG, electromyography; HCP, healthcare professional; MRI, magnetic resonance imaging; PAG, patient advocacy group; PCP, primary care physician; QoL, quality of life; SOD, superoxide dismutase.
